# Supplementary material
Source: Copernicus journal article supplement (doi:10.5194/essd-18-1463-2026)
Supplement: Supplementary file [file essd-18-1463-2026-supplement-title-page.pdf › essd-18-1463-2026-supplement-title-page.pdf]

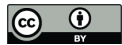

## *Supplement of*

# **More than a century of oceanic hydrography observations reveals profound climate-related changes in the Northwest Atlantic Ocean and its Arctic Gateways**

**Jonathan Coyne et al.**

*Correspondence to:* Jonathan Coyne ([jonathan.coyne@dfo-mpo.gc.ca](mailto:jonathan.coyne@dfo-mpo.gc.ca)) and Frédéric Cyr ([frederic.cyr@mi.mun.ca](mailto:frederic.cyr@mi.mun.ca))

- [essd-18-1463-2026-supplement-title-page.pdf](#)
- [Instrument\\_ID.xlsx](#)
- [Station\\_ID.xlsx](#)
- [bootstrap\\_climatology\\_01.nc](#)
- [bootstrap\\_climatology\\_02.nc](#)
- [bootstrap\\_climatology\\_03.nc](#)
- [bootstrap\\_climatology\\_04.nc](#)
- [bootstrap\\_climatology\\_05.nc](#)
- [bootstrap\\_climatology\\_06.nc](#)
- [bootstrap\\_climatology\\_07.nc](#)
- [bootstrap\\_climatology\\_08.nc](#)
- [bootstrap\\_climatology\\_09.nc](#)
- [bootstrap\\_climatology\\_10.nc](#)
- [bootstrap\\_climatology\\_11.nc](#)
- [bootstrap\\_climatology\\_12.nc](#)
- [bootstrapoutlier\\_eg\\_figure.png](#)

The copyright of individual parts of the supplement might differ from the article licence.
